# Supplementary material for: Typical Village and Town Houses in the Cold Region of Northeast China: Simulation Analysis of Courtyard Layout and Winter Wind Environment Habitability
Source: MDPI journal article supplement (doi:10.3390/buildings14010109), 2023-12-31
Supplement: s1 [file s1]

Archive with 1 entries (1 files):
- buildings-2725209-supplementary.pdf
