# Supplementary material for: Typical Village and Town Houses in the Cold Region of Northeast China: Simulation Analysis of Courtyard Layout and Winter Wind Environment Habitability
Source: MDPI journal article supplement (doi:10.3390/buildings14010109), 2023-12-31
Supplement: s1 [file s1 › buildings-2725209-supplementary.pdf]

## Supplement Information

# Typical Village and Town Houses in the Cold Region of Northeast China: Simulation Analysis of Courtyard Layout and Winter Wind Environment Habitability

Ruiheng Sun \*, Junyan Dong, Hui Zhao, Liying Wang \* and Di Qin \*

Department of Architecture, Changchun Institute of Technology, Changchun 130012, China

\* Correspondence: sunruiheng@ccit.edu.cn (R.S.); jz\_wly@ccit.edu.cn (L.W.);

qindi@ccit.edu.cn (D.Q.)

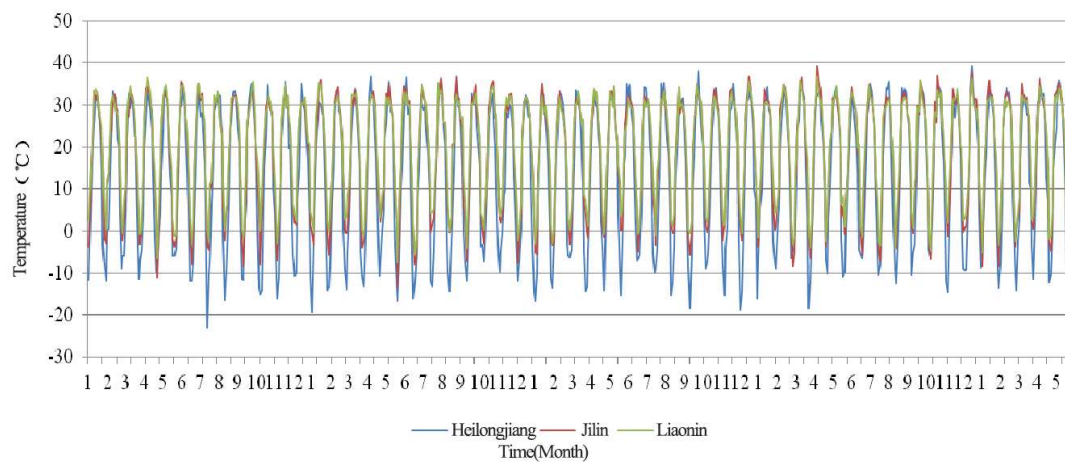

Figure S1. The extreme maximum temperature varies from month to month.

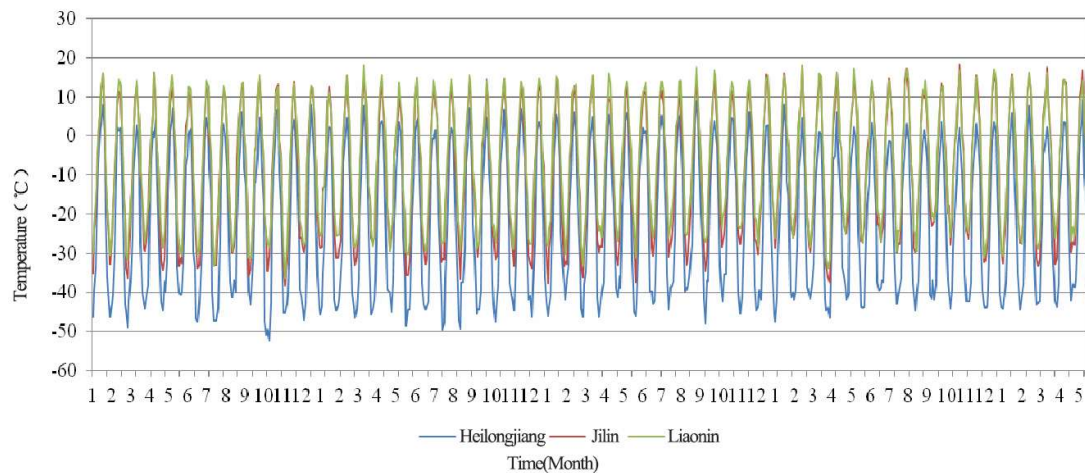

Figure S2. The extreme minimum temperature varies from month to month.

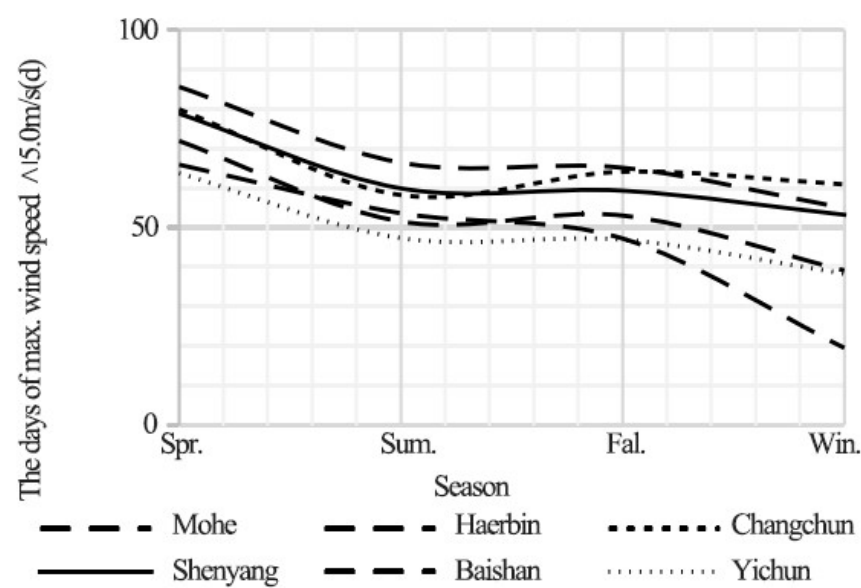

Figure S3. The days of max. wind speed  $\geq 5.0\text{m/s}$  of typical northeast city.

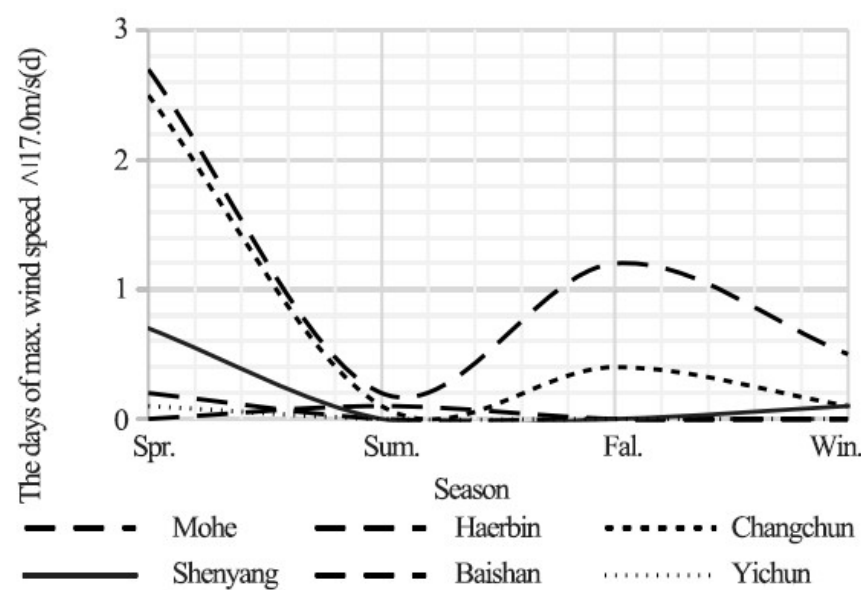

Figure S4. The days of max. wind speed  $\geq 17.0\text{m/s}$  of typical northeast city.
